# Supplementary material
Source: Frontiers journal article supplement (https://www.frontiersin.org/articles/522584)
Supplement: Presentation_1.pdf [file Presentation_1.pdf]

## **SUPPLEMENTARY MATERIAL**

**Supplementary Table S1.** Anthocyanins determined in strawberry samples by LC-DAD-ESI-MS/MS analysis, including peak number, retention time (RT), precursor and product ions, their tentative identification and abbreviation.

| Peak     | RT (min) | Precursor ion [M-H] <sup>+</sup> | Product ion | Tentative identification                    | Abbreviation             |
|----------|----------|----------------------------------|-------------|---------------------------------------------|--------------------------|
| <b>1</b> | 11.2     | 449                              | 287         | cyanidin 3- <i>O</i> -glucoside             | cya 3- <i>O</i> -glc     |
| <b>2</b> | 12.8     | 433                              | 271         | pelargonidin 3- <i>O</i> -glucoside         | pel 3- <i>O</i> -glc     |
| <b>3</b> | 13.5     | 579                              | 271         | pelargonidin 3- <i>O</i> -rutinoside        | pel 3- <i>O</i> -rut     |
| <b>4</b> | 14.5     | 519                              | 271         | pelargonidin 3- <i>O</i> -malonyl-glucoside | pel 3- <i>O</i> -mal-glc |
| <b>5</b> | 15.1     | 475                              | 271         | pelargonidin 3- <i>O</i> -acetyl-glucoside  | pel 3- <i>O</i> -ac-glc  |
| <b>6</b> | 17.0     | 449                              | 287         | cyanidin derivative                         | cya der                  |

**Supplementary Table S2.** Identification and quantification details of the proteins quantified in this study. Protein accession and description, exp.  $q$ -value, sum posterior error probability (PEP) score, sequence coverage (%), number of identified peptides, peptide spectrum matches (PSMs), protein groups, number of identified unique peptides, number of razor peptides and Mascot identification score are reported, together with protein theoretical values (number of amino acids, molecular mass, pI). Specific information on protein quantification are reported including: Found in file, Found in sample, modification(s), abundance ratios, abundance (grouped), abundance (scaled), abundance, abundance (normalized). TAIR accession number for homologues counterparts in *Arabidopsis thaliana* and results of Blast alignments are reported for the identified proteins.

**Supplementary Table S3.** Protein quantitative changes ascertained in fruits from plants treated with different *Trichoderma* strains, with respect to control. Functional assignment of proteins was performed as reported in the experimental section. Figures containing resulting outputs are also reported.

**Supplementary Table S4.** Top-15 entries deriving from functional enrichment analysis of strawberry DRPs after *Trichoderma* strain treatments. Results from Biological process (GO), Molecular function (GO) and KEGG pathways enrichment are shown.

| Biological Process (GO) |                                                        |                          |                             |
|-------------------------|--------------------------------------------------------|--------------------------|-----------------------------|
| <i>GO-term</i>          | <i>Description</i>                                     | <i>Count in gene set</i> | <i>False-discovery rate</i> |
| <u>GO:0010035</u>       | response to inorganic substance                        | 59 of 795                | 2.33e-25                    |
| <u>GO:0010038</u>       | response to metal ion                                  | 44 of 414                | 2.98e-24                    |
| <u>GO:0046686</u>       | response to cadmium ion                                | 38 of 286                | 5.61e-24                    |
| <u>GO:0042221</u>       | response to chemicals                                  | 90 of 2654               | 1.82e-17                    |
| <u>GO:0050896</u>       | response to stimulus                                   | 124 of 5064              | 3.16e-14                    |
| <u>GO:0051179</u>       | localization                                           | 75 of 2244               | 8.12e-14                    |
| <u>GO:0006810</u>       | transport                                              | 71 of 2140               | 7.59e-13                    |
| <u>GO:0044281</u>       | small molecule metabolic process                       | 58 of 1503               | 7.90e-13                    |
| <u>GO:0055086</u>       | nucleobase-containing small molecule metabolic process | 29 of 414                | 1.31e-11                    |
| <u>GO:0009117</u>       | nucleotide metabolic process                           | 26 of 323                | 1.31e-11                    |
| <u>GO:0055114</u>       | oxidation-reduction process                            | 52 of 1348               | 1.62e-11                    |
| <u>GO:0006950</u>       | response to stress                                     | 81 of 2932               | 4.76e-11                    |
| <u>GO:0019752</u>       | carboxylic acid metabolic process                      | 40 of 863                | 5.70e-11                    |
| <u>GO:0033036</u>       | macromolecule localization                             | 38 of 818                | 2.00e-10                    |
| <u>GO:0019637</u>       | organophosphate metabolic process                      | 31 of 547                | 2.01e-10                    |
| Molecular Function (GO) |                                                        |                          |                             |
| <i>GO-term</i>          | <i>Description</i>                                     | <i>Count in gene set</i> | <i>False-discovery rate</i> |
| <u>GO:0043167</u>       | ion binding                                            | 120 of 5070              | 2.55e-12                    |
| <u>GO:0005488</u>       | binding                                                | 170 of 8611              | 2.55e-12                    |
| <u>GO:0003824</u>       | catalytic activity                                     | 148 of 7239              | 1.82e-11                    |
| <u>GO:0036094</u>       | small molecule binding                                 | 76 of 2633               | 4.31e-11                    |
| <u>GO:0043168</u>       | anion binding                                          | 74 of 2629               | 2.55e-10                    |
| <u>GO:0000166</u>       | nucleotide binding                                     | 70 of 2461               | 6.15e-10                    |
| <u>GO:0016491</u>       | oxidoreductase activity                                | 45 of 1201               | 1.19e-09                    |
| <u>GO:0032553</u>       | ribonucleotide binding                                 | 64 of 2204               | 1.74e-09                    |
| <u>GO:0043169</u>       | cation binding                                         | 75 of 2949               | 8.74e-09                    |

|                   |                                            |            |          |
|-------------------|--------------------------------------------|------------|----------|
| <u>GO:0046872</u> | metal ion binding                          | 74 of 2940 | 1.74e-08 |
| <u>GO:0032555</u> | purine ribonucleotide binding              | 60 of 2179 | 4.23e-08 |
| <u>GO:0035639</u> | purine ribonucleoside triphosphate binding | 59 of 2147 | 5.59e-08 |
| <u>GO:0005507</u> | copper ion binding                         | 15 of 157  | 6.34e-08 |
| <u>GO:0016874</u> | ligase activity                            | 16 of 185  | 6.54e-08 |
| <u>GO:0019829</u> | cation-transporting ATPase activity        | 10 of 74   | 1.50e-06 |

### KEGG Pathways

| <b><i>Pathway</i></b> | <b><i>Description</i></b>                   | <b><i>Count in gene set</i></b> | <b><i>False-discovery rate</i></b> |
|-----------------------|---------------------------------------------|---------------------------------|------------------------------------|
| <u>ath01100</u>       | Metabolic pathways                          | 70 of 1899                      | 2.51e-15                           |
| <u>ath01110</u>       | Biosynthesis of secondary metabolites       | 44 of 1063                      | 5.48e-11                           |
| <u>ath00190</u>       | Oxidative phosphorylation                   | 17 of 149                       | 3.40e-10                           |
| <u>ath01200</u>       | Carbon metabolism                           | 19 of 261                       | 1.99e-08                           |
| <u>ath04141</u>       | Protein processing in endoplasmic reticulum | 15 of 205                       | 8.89e-07                           |
| <u>ath00970</u>       | Aminoacyl-tRNA biosynthesis                 | 8 of 57                         | 1.20e-05                           |
| <u>ath00710</u>       | Carbon fixation in photosynthetic organisms | 8 of 69                         | 3.80e-05                           |
| <u>ath04144</u>       | Endocytosis                                 | 10 of 142                       | 0.00013                            |
| <u>ath00620</u>       | Pyruvate metabolism                         | 8 of 85                         | 0.00013                            |
| <u>ath03013</u>       | RNA transport                               | 9 of 161                        | 0.0015                             |
| <u>ath00480</u>       | Glutathione metabolism                      | 7 of 98                         | 0.0017                             |
| <u>ath00010</u>       | Glycolysis / Gluconeogenesis                | 7 of 115                        | 0.0039                             |
| <u>ath03050</u>       | Proteasome                                  | 5 of 58                         | 0.0052                             |
| <u>ath00640</u>       | Propanoate metabolism                       | 4 of 33                         | 0.0052                             |
| <u>ath00030</u>       | Pentose phosphate pathway                   | 5 of 58                         | 0.0052                             |

**Supplementary Table S5.** Bridged and non-linked nodes identified during STRING analysis of DRPs present in strawberry fruits after plant treatment with *Trichoderma* strains (T22, TH1 and GV41). Functional protein associations were based on data recorded for *A. thaliana* protein homologues, whose name is also provided in the table.

| TAIR entry | Symbol    | Description                                                               |
|------------|-----------|---------------------------------------------------------------------------|
| AT1G01470  | LEA14     | Probable desiccation-related protein LEA14;                               |
| AT1G01800  | AT1G01800 | Short-chain dehydrogenase/reductase 2b-like;                              |
| AT1G02140  | MAGO      | Protein mago nashi homolog;                                               |
| AT1G02500  | SAM1      | S-adenosylmethionine synthetase 1;                                        |
| AT1G03860  | PHB2      | Prohibitin-2, mitochondrial;                                              |
| AT1G04510  | MAC3A     | Pre-mRNA-processing factor 19 homolog 1;                                  |
| AT1G04760  | VAMP726   | Putative vesicle-associated membrane protein 726;                         |
| AT1G07040  | AT1G07040 | Methyltransferase PMT9;                                                   |
| AT1G07810  | ECA1      | Calcium-transporting ATPase 1, endoplasmic reticulum-type;                |
| AT1G07990  | AT1G07990 | SIT4 phosphatase-associated family protein;                               |
| AT1G08420  | BSL2      | Serine/threonine-protein phosphatase BSL2;                                |
| AT1G08830  | CSD1      | Cytosolic copper/zinc superoxide dismutase;                               |
| AT1G09080  | BIP3      | Probable mediator of RNA polymerase II transcription subunit 37b;         |
| AT1G09210  | CRT1b     | Calreticulin 1b;                                                          |
| AT1G09620  | AT1G09620 | Leucine-tRNA ligase, cytoplasmic;                                         |
| AT1G09630  | RAB11c    | Ras-related protein RABA2a;                                               |
| AT1G10390  | AT1G10390 | Nuclear pore complex protein NUP98A;                                      |
| AT1G10950  | TMN1      | Transmembrane 9 superfamily member 1;                                     |
| AT1G12310  | AT1G12310 | Calcium-binding EF-hand family protein;                                   |
| AT1G12640  | LPLAT1    | MBOAT (membrane bound O-acyl transferase) family protein;                 |
| AT1G12900  | GAPA-2    | Glyceraldehyde-3-phosphate dehydrogenase GAPA2, chloroplastic;            |
| AT1G13440  | GAPC2     | Glyceraldehyde-3-phosphate dehydrogenase GAPC2, cytosolic;                |
| AT1G13700  | PGL1      | Probable 6-phosphogluconolactonase 1;                                     |
| AT1G14610  | TWN2      | Valyl-tRNA synthetase/valine-tRNA ligase (VALRS);                         |
| AT1G15520  | ABCG40    | Pleiotropic drug resistance protein 1-like;                               |
| AT1G15690  | AVP1      | Pyrophosphate-energized vacuolar membrane proton pump 1;                  |
| AT1G16030  | Hsp70b    | Heat shock 70 kDa protein 5;                                              |
| AT1G16780  | VHP2;2    | Pyrophosphate-energized membrane proton pump 3;                           |
| AT1G17260  | AHA10     | Autoinhibited H(+)-ATPase isoform 10;                                     |
| AT1G17880  | BTF3      | Basic transcription factor 3 (BTF3);                                      |
| AT1G18080  | ATARCA    | Transducin/WD40 repeat-like superfamily protein;                          |
| AT1G20200  | EMB2719   | 26S Proteasome non-ATPase regulatory subunit 3 homolog A;                 |
| AT1G20330  | SMT2      | 24-Methylenesterol C-methyltransferase 2;                                 |
| AT1G20950  | AT1G20950 | Pyrophosphate--fructose 6-phosphate 1-phosphotransferase subunit alpha 1; |
| AT1G21750  | PDIL1-1   | Protein disulfide isomerase-like (PDIL) protein;                          |
| AT1G23100  | AT1G23100 | Putative 10kDa chaperonin (CPN10) protein;                                |
| AT1G23740  | AOR       | NADPH-dependent alkenal/one oxidoreductase, chloroplastic;                |
| AT1G24360  | AT1G24360 | 3-Oxoacyl-[acyl-carrier-protein] reductase, chloroplastic;                |
| AT1G25480  | AT1G25480 | Aluminium activated malate transporter family protein;                    |
| AT1G26110  | DCP5      | Protein decapping 5;                                                      |
| AT1G26880  | AT1G26880 | Ribosomal protein L34e superfamily protein;                               |
| AT1G27310  | NTF2A     | Nuclear transport factor 2A;                                              |
| AT1G29880  | AT1G29880 | Glycyl-tRNA synthetase/glycine-tRNA ligase;                               |
| AT1G29900  | CARB      | Carbamoyl-phosphate synthase large chain, chloroplastic;                  |
| AT1G29990  | PFD6      | Prefoldin 6;                                                              |
| AT1G31812  | ACBP6     | Acyl-CoA-binding domain-containing protein 6;                             |
| AT1G31850  | AT1G31850 | S-adenosyl-L-methionine-dependent methyltransferase superfamily protein;  |
| AT1G32900  | GBSS1     | Granule-bound starch synthase 1, chloroplastic/amyloplastic;              |
| AT1G35620  | PDIL5-2   | Protein disulfide-isomerase 5-2;                                          |
| AT1G36160  | ACC1      | Acetyl-CoA carboxylase 1;                                                 |
| AT1G36180  | ACC2      | Acetyl-CoA carboxylase 2;                                                 |
| AT1G47550  | SEC3A     | Exocyst complex component SEC3A;                                          |
| AT1G47710  | SERPIN1   | Serine protease inhibitor (SERPIN) family protein;                        |
| AT1G48410  | AGO1      | Stabilizer of iron transporter SufD/Polynucleotidyl transferase;          |

|           |           |                                                                           |
|-----------|-----------|---------------------------------------------------------------------------|
| AT1G48830 | AT1G48830 | Ribosomal protein S7e family protein;                                     |
| AT1G48850 | EMB1144   | Chorismate synthase;                                                      |
| AT1G50500 | HIT1      | Vacuolar protein sorting-associated protein 53 A;                         |
| AT1G50920 | AT1G50920 | Nucleolar GTP-binding protein 1;                                          |
| AT1G52800 | AT1G52800 | Putative oxoglutarate/iron-dependent dioxygenase;                         |
| AT1G53310 | PPC1      | Phosphoenolpyruvate carboxylase 1;                                        |
| AT1G54630 | ACP3      | Acyl carrier protein                                                      |
| AT1G56070 | LOS1      | Ribosomal protein S5/Elongation factor G/III/V family protein;            |
| AT1G59960 | AT1G59960 | Non-functional NADPH-dependent codeinone reductase 2;                     |
| AT1G60420 | AT1G60420 | Nucleoredoxin 1;                                                          |
| AT1G60500 | DRP4C     | Dynamin related protein 4C;                                               |
| AT1G60690 | AT1G60690 | Putative perakine reductase;                                              |
| AT1G60710 | ATB2      | Probable aldo-keto reductase 2;                                           |
| AT1G62020 | AT1G62020 | Coatomer subunit alpha-1;                                                 |
| AT1G63220 | AT1G63220 | Elicitor-responsive protein 3-like protein;                               |
| AT1G65930 | cICDH     | Cytosolic NADP <sup>+</sup> -dependent isocitrate dehydrogenase;          |
| AT1G65980 | TPX1      | Peroxiredoxin-2B;                                                         |
| AT1G66950 | ABCG39    | Pleiotropic drug resistance protein 2-like protein;                       |
| AT1G71220 | EBS1      | UDP-glucose:glycoprotein glucosyltransferase;                             |
| AT1G73370 | SUS6      | Sucrose synthase 6;                                                       |
| AT1G74380 | XXT5      | Probable xyloglucan 6-xylosyltransferase 5;                               |
| AT1G74920 | ALDH10A8  | Betaine aldehyde dehydrogenase                                            |
| AT1G75270 | DHAR2     | Glutathione S-transferase DHAR2;                                          |
| AT1G75280 | AT1G75280 | NmrA-like negative transcriptional regulator family protein;              |
| AT1G76550 | AT1G76550 | Pyrophosphate--fructose 6-phosphate 1-phosphotransferase subunit alpha 2; |
| AT1G77550 | AT1G77550 | Tubulin-tyrosine ligase;                                                  |
| AT1G77700 | AT1G77700 | Pathogenesis-related thaumatin superfamily protein;                       |
| AT1G78870 | UBC35     | Ubiquitin-conjugating enzyme E2 35;                                       |
| AT1G78950 | BAS       | Beta-amyrin synthase-like protein;                                        |
| AT1G79570 | AT1G79570 | Protein kinase with octicosapeptide/Phox/Bem1p domain;                    |
| AT1G79690 | NUDT3     | Nudix hydrolase homolog 3;                                                |
| AT1G79930 | HSP91     | Heat shock 70 kDa protein 14;                                             |
| AT1G80070 | EMB14     | Pre-mRNA-processing-splicing factor 8A;                                   |
| AT1G80230 | AT1G80230 | Cytochrome c oxidase subunit 5b-2, mitochondrial;                         |
| AT1G80300 | NTT1      | ADP/ATP carrier protein 1, chloroplastic;                                 |
| AT1G80410 | EMB2753   | N-terminal acetyltransferase A complex auxiliary subunit NAA15;           |
| AT1G80490 | T21F11.18 | Topless-related protein 1;                                                |
| AT2G01530 | MLP329    | MLP-like protein 329 (MLP329);                                            |
| AT2G01690 | AT2G01690 | ARM repeat superfamily protein;                                           |
| AT2G02560 | CAND1     | Homolog of cullin-associated and neddylation-dissociated protein;         |
| AT2G15220 | AT2G15220 | Plant basic secretory protein (BSP) family protein;                       |
| AT2G16600 | ROC3      | Peptidyl-prolyl cis-trans isomerase CYP19-1;                              |
| AT2G17980 | ATSLY1    | Sec1/munc18-like (SM) proteins superfamily;                               |
| AT2G20420 | AT2G20420 | Succinate-CoA ligase [ADP-forming] subunit beta, mitochondrial;           |
| AT2G20580 | RPN1A 26S | Proteasome non-ATPase regulatory subunit 2 homolog A;                     |
| AT2G20760 | AT2G20760 | Clathrin light chain protein;                                             |
| AT2G21790 | RNR1      | Ribonucleoside-diphosphate reductase large subunit;                       |
| AT2G21870 | MGP1      | ATP synthase 24 kDa subunit;                                              |
| AT2G22400 | AT2G22400 | Multisite-specific tRNA:(cytosine-C(5))-methyltransferase-like;           |
| AT2G22780 | PMDH1     | Peroxisomal NAD-malate dehydrogenase 1;                                   |
| AT2G23420 | NAPRT2    | Nicotinate phosphoribosyltransferase 2;                                   |
| AT2G24020 | AT2G24020 | Nucleoid-associated protein At2g24020, chloroplastic;                     |
| AT2G24520 | HA5       | ATPase 5, plasma membrane-type;                                           |
| AT2G24940 | MAPR2     | Steroid-binding protein 3;                                                |
| AT2G26890 | GRV2      | DNAJ heat shock N-terminal domain-containing protein;                     |
| AT2G27600 | SKD1      | Protein suppressor of K(+) transport growth defect 1;                     |
| AT2G30110 | UBA1      | Ubiquitin-activating enzyme (E1);                                         |
| AT2G31370 | AT2G31370 | Transcription factor RF2b;                                                |
| AT2G31660 | SAD2      | Importin beta-like SAD2;                                                  |
| AT2G32520 | AT2G32520 | 2-Oxo-3-(5-oxofuran-2-ylidene)propanoate lactonase;                       |
| AT2G33870 | ArRABA1h  | Ras-related protein RABA1h;                                               |
| AT2G34160 | AT2G34160 | Uncharacterized protein At2g34160;                                        |

|           |            |                                                                                      |
|-----------|------------|--------------------------------------------------------------------------------------|
| AT2G36250 | FTSZ2-1    | Cell division protein FtsZ homolog 2-1, chloroplastic;                               |
| AT2G36380 | ABCG34     | Pleiotropic drug resistance protein 2-like;                                          |
| AT2G36530 | LOS2       | Bifunctional enolase 2/transcriptional activator;                                    |
| AT2G37170 | PIP2B      | Plasma membrane intrinsic protein 2;                                                 |
| AT2G37270 | RPS5B      | Ribosomal protein S;                                                                 |
| AT2G39390 | AT2G39390  | 60S Ribosomal L29 family protein;                                                    |
| AT2G39730 | RCA        | Ribulose biphosphate carboxylase/oxygenase activase, chloroplastic;                  |
| AT2G39770 | CYT1       | Mannose-1-phosphate guanylyltransferase 1;                                           |
| AT2G39780 | RNS2       | Ribonuclease 2;                                                                      |
| AT2G40800 | AT2G40800  | Import inner membrane translocase subunit;                                           |
| AT2G40890 | CYP98A3    | Cytochrome P450, family 98, subfamily A, polypeptide 3;                              |
| AT2G41680 | NTRC       | NADPH-dependent thioredoxin reductase 3;                                             |
| AT2G41790 | AT2G41790  | Insulinase (Peptidase family M16) family protein;                                    |
| AT2G44060 | AT2G44060  | Late embryogenesis abundant protein, group 2;                                        |
| AT2G45990 | AT2G45990  | Ribosomal RNA small subunit methyltransferase G;                                     |
| AT2G46520 | AT2G46520  | Cellular apoptosis susceptibility protein, putative/importin-alpha re-exporter;      |
| AT2G47730 | GSTF8      | Glutathione S-transferase F8, chloroplastic;                                         |
| AT3G01390 | VMA10      | V-type proton ATPase subunit G1;                                                     |
| AT3G01480 | CYP38      | Peptidyl-prolyl cis-trans isomerase CYP38,                                           |
| AT3G01640 | GLCAK      | Glucuronokinase 1;                                                                   |
| AT3G01680 | SEOR1      | Protein sieve element occlusion B;                                                   |
| AT3G01780 | TPLATE     | ARM repeat superfamily protein;                                                      |
| AT3G03070 | AT3G03070  | NADH dehydrogenase [ubiquinone] iron-sulfur protein 6, mitochondrial;                |
| AT3G04790 | EMB3119    | Probable ribose-5-phosphate isomerase 3, chloroplastic;                              |
| AT3G05040 | HASTY      | Exportin-1/importin-beta;                                                            |
| AT3G06050 | PRXIIF     | Peroxisredoxin-2F, mitochondrial;                                                    |
| AT3G07100 | ERMO2      | Protein transport protein Sec24-like At3g07100;                                      |
| AT3G09980 | AT3G09980  | RAB6-interacting golgin;                                                             |
| AT3G10920 | MSD1       | Superoxide dismutase [Mn] 1, mitochondrial;                                          |
| AT3G11050 | FER2       | Ferritin-2, chloroplastic;                                                           |
| AT3G11130 | AT3G11130  | Clathrin heavy chain 1;                                                              |
| AT3G11400 | EIF3G1     | Eukaryotic translation initiation factor 3 subunit G;                                |
| AT3G11830 | AT3G11830  | T-complex protein 1 subunit eta;                                                     |
| AT3G11910 | UBP13      | Ubiquitin carboxyl-terminal hydrolase 13;                                            |
| AT3G12490 | CYSB       | Cysteine proteinase inhibitor 6;                                                     |
| AT3G12580 | HSP70      | Mediator of RNA polymerase II transcription subunit 37c;                             |
| AT3G13330 | PA200      | Proteasome activating protein 200;                                                   |
| AT3G14420 | GOX1       | Peroxisomal (S)-2-hydroxy-acid oxidase-like;                                         |
| AT3G14940 | PPC3       | Cytosolic phosphoenolpyruvate carboxylase;                                           |
| AT3G15660 | GRX4       | Monothiol glutaredoxin-S15, mitochondrial;                                           |
| AT3G15730 | PLDALPHA1  | Phospholipase D alpha 1;                                                             |
| AT3G15880 | WSIP2      | Topless-related protein 4;                                                           |
| AT3G16640 | TCTP       | Translationally controlled tumor protein;                                            |
| AT3G16810 | PUM24      | Pumilio homolog 24;                                                                  |
| AT3G17210 | HS1        | Stress-response A/B barrel domain-containing protein HS1;                            |
| AT3G17390 | MTO3       | S-adenosylmethionine synthetase family protein;                                      |
| AT3G19000 | AT3G19000  | 2-Oxoglutarate (2OG) and Fe(II)-dependent oxygenase superfamily protein;             |
| AT3G19240 | AT3G19240  | Vacuolar import/degradation, Vid27-related protein;                                  |
| AT3G20390 | AT3G20390  | Reactive intermediate deaminase A, chloroplastic;                                    |
| AT3G20920 | AT3G20920  | Translocation protein Sec62;                                                         |
| AT3G21790 | AT3G21790  | UDP-glucose flavonoid 3-O-glucosyltransferase 3;                                     |
| AT3G22630 | PBD1       | Proteasome subunit beta type-2-A;                                                    |
| AT3G22640 | PAP85      | Vicilin-like seed storage protein At3g22640;                                         |
| AT3G25800 | PP2AA2     | Serine/threonine-protein phosphatase 2A 65 kDa regulatory subunit A $\beta$ isoform; |
| AT3G26060 | PRXQ       | Peroxisredoxin Q protein;                                                            |
| AT3G29360 | UGD2       | UDP-glucose 6-dehydrogenase family protein;                                          |
| AT3G42170 | DAYSLEEPER | Zinc finger BED domain-containing protein DAYSLEEPER;                                |
| AT3G42640 | HA8        | ATPase 8, plasma membrane-type;                                                      |
| AT3G43190 | SUS4       | Sucrose synthase 4;                                                                  |
| AT3G43300 | ATMIN7     | Brefeldin A-inhibited guanine nucleotide-exchange protein 5;                         |
| AT3G43810 | CAM7       | Calmodulin-7;                                                                        |
| AT3G45140 | LOX2       | Linoleate 13S-lipoxygenase 2-1;                                                      |



|           |           |                                                                              |
|-----------|-----------|------------------------------------------------------------------------------|
| AT3G45600 | TET3      | Tetraspanin-3;                                                               |
| AT3G47950 | HA4       | ATPase 4, plasma membrane-type;                                              |
| AT3G48140 | AT3G48140 | B12D protein;                                                                |
| AT3G48890 | MAPR3     | Putative progesterone-binding protein homolog (Atmp2) mRNA;                  |
| AT3G50590 | AT3G50590 | Transducin/WD40 repeat-like superfamily protein;                             |
| AT3G51730 | AT3G51730 | Saposin B domain-containing protein;                                         |
| AT3G51810 | EM1       | Stress induced protein;                                                      |
| AT3G52140 | NOXY38    | Tetratricopeptide repeat (TPR)-containing protein;                           |
| AT3G52300 | ATPQ      | ATP synthase subunit d, mitochondrial;                                       |
| AT3G52730 | AT3G52730 | Cytochrome b-c1 complex subunit 9;                                           |
| AT3G52990 | AT3G52990 | Pyruvate kinase 1;                                                           |
| AT3G53230 | AtCDC48B  | Cell division control protein 48 homolog D;                                  |
| AT3G53260 | PAL2      | Phenylalanine ammonia-lyase 2;                                               |
| AT3G53420 | PIP2A     | Plasma membrane intrinsic protein subfamily PIP2;                            |
| AT3G53990 | AT3G53990 | Universal stress protein A;                                                  |
| AT3G54440 | AT3G54440 | Beta-galactosidase;                                                          |
| AT3G54820 | PIP2;5    | Plasma membrane intrinsic protein 2;5;                                       |
| AT3G55410 | AT3G55410 | 2-Oxoglutarate dehydrogenase, E1 component;                                  |
| AT3G56070 | ROC2      | Peptidyl-prolyl cis-trans isomerase CYP19-3;                                 |
| AT3G57520 | SIP2      | Probable galactinol-sucrose galactosyltransferase 2;                         |
| AT3G60860 | AT3G60860 | Brefeldin A-inhibited guanine nucleotide-exchange protein 2;                 |
| AT3G62120 | AT3G62120 | Proline-tRNA ligase;                                                         |
| AT3G62560 | AT3G62560 | GTP-binding protein SAR1A-like;                                              |
| AT3G63460 | AT3G63460 | Transport protein SEC31 homolog B;                                           |
| AT4G00430 | PIP1;4    | Plasma membrane intrinsic protein 1;4;                                       |
| AT4G01320 | ATSTE24   | Peptidase family M48 family protein;                                         |
| AT4G01900 | GLB1      | Nitrogen regulatory protein P-II homolog;                                    |
| AT4G02080 | SAR2      | Secretion-associated RAS super family 2;                                     |
| AT4G02350 | SEC15B    | Exocyst complex component EXOC6/SEC15B;                                      |
| AT4G02450 | AT4G02450 | HSP20-like chaperones superfamily protein;                                   |
| AT4G02570 | CUL1      | Cullin-1;                                                                    |
| AT4G02620 | AT4G02620 | H(+)-transporting two-sector ATPase;                                         |
| AT4G03240 | FH        | Frataxin, mitochondrial;                                                     |
| AT4G04020 | FIB       | Probable plastid-lipid-associated protein 1, chloroplastic;                  |
| AT4G05050 | UBQ11     | Polyubiquitin 11;                                                            |
| AT4G09320 | NDPK1     | Nucleoside diphosphate kinase B-like isoform;                                |
| AT4G10040 | CYTC-2    | Cytochrome c-2;                                                              |
| AT4G10320 | AT4G10320 | Isoleucine-tRNA ligase;                                                      |
| AT4G11600 | GPX6      | Probable phospholipid hydroperoxide glutathione peroxidase 6, mitochondrial; |
| AT4G11740 | SAY1      | Plant UBX domain-containing protein 8;                                       |
| AT4G12400 | Hop3      | Stress-inducible protein, putative;                                          |
| AT4G13200 | AT4G13200 | Uncharacterized protein At4g13200, chloroplastic;                            |
| AT4G13780 | AT4G13780 | Methionine-tRNA ligase, putative/methionyl-tRNA synthetase,                  |
| AT4G16130 | ARA1      | Arabinose kinase;                                                            |
| AT4G16720 | AT4G16720 | 60S ribosomal protein L23/L15e family protein;                               |
| AT4G18100 | AT4G18100 | Ribosomal protein L32e;                                                      |
| AT4G18360 | GOX3      | Peroxisomal (S)-2-hydroxy-acid oxidase GLO5;                                 |
| AT4G19006 | AT4G19006 | 26S proteasome non-ATPase regulatory subunit 13 homolog B;                   |
| AT4G19120 | ERD3      | Methyltransferase PMT21;                                                     |
| AT4G20980 | AT4G20980 | Eukaryotic translation initiation factor 3 subunit 7 (eIF-3);                |
| AT4G21580 | AT4G21580 | Quinone oxidoreductase PIG3-like;                                            |
| AT4G23460 | AT4G23460 | Beta-adaptin-like protein C;                                                 |
| AT4G26910 | AT4G26910 | Dihydrolipoamide succinyltransferase;                                        |
| AT4G27130 | AT4G27130 | Translation initiation factor SUI1 family protein;                           |
| AT4G27270 | AT4G27270 | NAD(P)H dehydrogenase (quinone) FQR1-like 1;                                 |
| AT4G29900 | ACA10     | Calcium-transporting ATPase 10, plasma membrane-type;                        |
| AT4G30440 | GAE1      | UDP-D-glucuronate 4-epimerase 1;                                             |
| AT4G30600 | AT4G30600 | Signal recognition particle receptor alpha subunit family protein;           |
| AT4G31080 | AT4G31080 | Integral membrane metal-binding family protein (DUF2296);                    |
| AT4G31480 | AT4G31480 | Coatomer subunit beta-1 (COPB1);                                             |
| AT4G32910 | AT4G32910 | Nuclear pore complex protein NUP85;                                          |
| AT4G33070 | AT4G33070 | Thiamine pyrophosphate dependent pyruvate decarboxylase family protein;      |

|           |             |                                                                         |
|-----------|-------------|-------------------------------------------------------------------------|
| AT4G33090 | APM1        | Aminopeptidase M1;                                                      |
| AT4G33150 | AT4G33150   | Alpha-aminoadipic semialdehyde synthase;                                |
| AT4G33640 | AT4G33640   | Costars family protein At4g33640;                                       |
| AT4G34450 | AT4G34450   | Coatomer gamma-2 subunit, putative/gamma-2 coat protein;                |
| AT4G34640 | SQS1        | Squalene synthase;                                                      |
| AT4G34860 | A/N-InvB    | Beta-fructofuranosidase;                                                |
| AT4G35220 | AT4G35220   | Cyclase family protein;                                                 |
| AT4G36910 | LEJ2        | CBS domain-containing protein CBSX1, chloroplastic;                     |
| AT4G37980 | ELI3-1      | Cinnamyl alcohol dehydrogenase 7/mannitol dehydrogenase;                |
| AT4G37990 | ELI3-2      | Cinnamyl alcohol dehydrogenase 8/mannitol dehydrogenase;                |
| AT4G38600 | KAK         | E3 ubiquitin-protein ligase                                             |
| AT4G39230 | AT4G39230   | NmrA-like negative transcriptional regulator family protein;            |
| AT4G39260 | GRP8        | Glycine-rich RNA-binding, abscisic acid-inducible protein;              |
| AT5G01600 | FER1        | Ferritin-1, chloroplastic;                                              |
| AT5G02500 | HSC70-1     | Heat shock cognate 70 kDa protein 2-like;                               |
| AT5G02790 | GSTL3       | Glutathione S-transferase family protein;                               |
| AT5G05010 | AT5G05010   | Coatomer subunit delta-like;                                            |
| AT5G06460 | UBA2        | Ubiquitin/SUMO-activating enzyme E1 2;                                  |
| AT5G06970 | AT5G06970   | Protein of unknown function (DUF810);                                   |
| AT5G07350 | Tudor1      | Ribonuclease TUDOR 1;                                                   |
| AT5G08290 | YLS8        | mRNA splicing factor, thioredoxin-like U5 snRNP;                        |
| AT5G09650 | PPa6        | Soluble inorganic pyrophosphatase 6, chloroplastic;                     |
| AT5G10840 | EMP1        | Transmembrane 9 superfamily member 8;                                   |
| AT5G10860 | CBSX3       | CBS domain-containing protein CBSX3, mitochondrial;                     |
| AT5G11040 | TRS120      | TRAPP II complex, Trs120 protein;                                       |
| AT5G11520 | ASP3        | Aspartate aminotransferase 3, chloroplastic;                            |
| AT5G13560 | AT5G13560   | Structural maintenance of chromosomes protein;                          |
| AT5G13930 | TT4         | Chalcone and stilbene synthase family protein;                          |
| AT5G15270 | AT5G15270   | RNA-binding KH domain-containing protein;                               |
| AT5G17020 | XPO1A       | Protein exportin 1A;                                                    |
| AT5G17330 | GAD         | Glutamate decarboxylase 1;                                              |
| AT5G19820 | emb2734     | Importin 5/uncharacterized protein At5g19820;                           |
| AT5G20280 | SPS1F       | Sucrose phosphate synthase 1F;                                          |
| AT5G20490 | XIK         | Myosin family protein with Dil domain having ATPase activity;           |
| AT5G20720 | CPN20       | 20 kDa Chaperonin, chloroplastic;                                       |
| AT5G20890 | AT5G20890   | TCP-1/cpn60 chaperonin family protein;                                  |
| AT5G22780 | AT5G22780   | Adaptor protein complex AP-2, alpha subunit;                            |
| AT5G25450 | AT5G25450   | Cytochrome bd ubiquinol oxidase, 14kDa subunit;                         |
| AT5G25757 | AT5G25757.1 | Eukaryotic translation initiation factor 3 subunit L;                   |
| AT5G25880 | NADP-ME3    | NADP-dependent malic enzyme (EC 1.1.1.40);                              |
| AT5G26710 | AT5G26710   | Glutamyl/glutaminyI-tRNA synthetase, class Ic;                          |
| AT5G26830 | AT5G26830   | Threonine-tRNA ligase, mitochondrial 1;                                 |
| AT5G27030 | F2P16.14    | Topless-related protein 3;                                              |
| AT5G27120 | AT5G27120   | NOP56-like pre RNA processing ribonucleoprotein;                        |
| AT5G28830 | AT5G28830   | Calcium-binding EF hand family protein;                                 |
| AT5G34850 | PAP26       | Bifunctional purple acid phosphatase 26;                                |
| AT5G35160 | AT5G35160   | Endomembrane protein 70 protein family;                                 |
| AT5G35360 | CAC2        | Acetyl Co-enzyme a carboxylase biotin carboxylase subunit;              |
| AT5G35700 | FIM5        | Fimbrin-like protein 2;                                                 |
| AT5G36110 | CYP716A1    | Cytochrome P450, family 716, subfamily A, polypeptide 1;                |
| AT5G36210 | AT5G36210   | Peptidase belonging to the alpha/beta-Hydrolases superfamily;           |
| AT5G37780 | CAM1        | Calmodulin involved in thigmomorphogenesis;                             |
| AT5G39410 | AT5G39410   | Mitochondrial saccharopine dehydrogenase-like oxidoreductase At5g39410; |
| AT5G39850 | AT5G39850   | Ribosomal protein S4;                                                   |
| AT5G40770 | PHB3        | Prohibitin-3, mitochondrial;                                            |
| AT5G41670 | AT5G41670   | 6-Phosphogluconate dehydrogenase, decarboxylating 2, chloroplastic;     |
| AT5G42420 | AT5G42420   | Nucleotide-sugar phosphate transporter family protein;                  |
| AT5G45160 | RL2         | Root hair defective 3 GTP-binding protein;                              |
| AT5G46070 | AT5G46070   | Guanylate-binding family protein;                                       |
| AT5G47030 | AT5G47030   | ATP synthase subunit delta', mitochondrial;                             |
| AT5G50530 | CBSCBSPB4   | CBS/octicosapeptide/Phox/Bemp1 domains-containing protein CBSCBSPB1;    |
| AT5G51970 | AT5G51970   | Sorbitol dehydrogenase;                                                 |

|           |           |                                                            |
|-----------|-----------|------------------------------------------------------------|
| AT5G53480 | AT5G53480 | Armadillo-like helical, importin subunit beta-1;           |
| AT5G53530 | VPS26A    | Vacuolar protein sorting-associated protein 26A;           |
| AT5G53560 | CBS-E     | Cytochrome b5 isoform E;                                   |
| AT5G54500 | FQR1      | NAD(P)H dehydrogenase (quinone) FQR1-like protein;         |
| AT5G54960 | PDC2      | Pyruvate decarboxylase-2; belongs to the TPP enzyme family |
| AT5G55160 | SUMO2     | Small ubiquitin-like modifier (SUMO) polypeptide;          |
| AT5G55200 | MGE1      | GrpE protein homolog 1, mitochondrial;                     |
| AT5G55240 | ATPXG2    | Arabidopsis thaliana peroxigenase 2;                       |
| AT5G55940 | emb2731   | ER membrane protein complex subunit 8/9 homolog;           |
| AT5G58070 | TIL       | Temperature-induced lipocalin-1;                           |
| AT5G59240 | AT5G59240 | 40S ribosomal protein S8;                                  |
| AT5G59970 | At1g07660 | Histone superfamily protein;                               |
| AT5G60390 | At1g07940 | Elongation factor 1-alpha;                                 |
| AT5G62390 | BAG7      | BAG family molecular chaperone regulator 7;                |
| AT5G62670 | HA11      | ATPase 11, plasma membrane-type;                           |
| AT5G62890 | AT5G62890 | Xanthine/uracil/vitamin C permease family protein;         |
| AT5G63400 | At5g63400 | Adenylate kinase 4;                                        |
| AT5G64130 | AT5G64130 | cAMP-regulated phosphoprotein 19-related protein;          |
| AT5G64250 | AT5G64250 | 2-Nitropropane dioxygenase-like protein;;                  |
| AT5G67500 | VDAC2     | Mitochondrial outer membrane protein porin 2;              |
| ATMG0066  | NAD5B     | NADH-ubiquinone oxidoreductase chain 5;                    |
| AT2G47780 | REF       | Rubber elongation factor protein.                          |

### Figure legends

**Supplementary Figure S1.** HPLC-DAD chromatogram of an exemplificative strawberry dried extract recorded at 520 nm. Putative compound identification was performed according to the scientific literature (Holzwarth 2012; Carbone et al., 2009). (1) cyanidin 3-*O*-glucoside; (2) pelargonidin 3-*O*-glucoside; (3) pelargonidin 3-*O*-rutinoside; (4) pelargonidin 3-*O*-malonyl-glucoside; (5) pelargonidin 3-*O*-acetyl-glucoside; (6) cyanidin derivative.

**Supplementary Figure S2.** Heat-map representation and hierarchical clustering analysis of proteins involved in solute transport (upper panel), calcium metabolism (middle panel) and nutrient uptake (lower panel), which were differentially represented in strawberry fruits produced by plants subjected to the treatments with *Trichoderma* strains (T22, TH1 and GV41), as compared to control (Ctr). Shown are proteins presenting abundance fold changes  $\geq 1.50$  or  $\leq 0.66$  with respect to control ( $P \leq 0.05$ ) (Supplementary Table S3). Data are reported as  $\log_2$  transformed abundance ratio values.

**Supplementary Figure S3.** Heat-map representation and hierarchical clustering analysis of proteins involved in carbon and energy metabolism that were differentially represented in strawberry fruits produced by plants subjected to the treatments with *Trichoderma* strains (T22, TH1 and GV41), as compared to control (Ctr). Shown are proteins presenting abundance fold changes  $\geq 1.50$  or  $\leq 0.66$  with respect to control ( $P \leq 0.05$ ) (Supplementary Table S3). Data are reported as  $\log_2$  transformed abundance ratio values.

**Supplementary Figure S4.** Heat-map representation and hierarchical clustering analysis of proteins involved in stress response that were differentially represented in strawberry fruits produced by plants subjected to the treatments with *Trichoderma* strains (T22, TH1 and GV41), as compared to control (Ctr). Shown are proteins presenting abundance fold changes  $\geq 1.50$  or  $\leq 0.66$  with respect to control ( $P \leq 0.05$ ) (Supplementary Table S3). Data are reported as  $\log_2$  transformed abundance ratio values.

**Supplementary Figure S5.** Heat-map representation and hierarchical clustering analysis of proteins involved in amino acid metabolism (upper panel), coenzyme metabolism (middle panel), nucleotide metabolism (middle panel) or lipid metabolism (lower panel), which were differentially

represented in strawberry fruits produced by plants subjected to the treatments with *Trichoderma* strains (T22, TH1 and GV41), as compared to control (Ctr). Shown are proteins presenting abundance fold changes  $\geq 1.50$  or  $\leq 0.66$  with respect to control ( $P \leq 0.05$ ) (Supplementary Table S3). Data are reported as  $\log_2$  transformed abundance ratio values.

**Supplementary Figure S6.** Heat-map representation and hierarchical clustering analysis of proteins involved in RNA biosynthesis (upper panel), RNA processing (middle panel) and protein biosynthesis (lower panel), which were differentially represented in strawberry fruits produced by plants subjected to the treatments with *Trichoderma* strains (T22, TH1 and GV41), as compared to control (Ctr). Shown are proteins presenting abundance fold changes  $\geq 1.50$  or  $\leq 0.66$  with respect to control ( $P \leq 0.05$ ) (Supplementary Table S3). Data are reported as  $\log_2$  transformed abundance ratio values.

**Supplementary Figure S7.** Heat-map representation and hierarchical clustering analysis of proteins involved in protein modification (upper panel), protein translocation (middle panel) and protein degradation (lower panel), which were differentially represented in strawberry fruits produced by plants subjected to the treatments with *Trichoderma* strains (T22, TH1 and GV41), as compared to control (Ctr). Shown are proteins presenting abundance fold changes  $\geq 1.50$  or  $\leq 0.66$  with respect to control ( $P \leq 0.05$ ) (Supplementary Table S3). Data are reported as  $\log_2$  transformed abundance ratio values.

**Supplementary Figure S8.** Heat-map representation and hierarchical clustering analysis of proteins involved in cytoskeleton (upper panel), cell wall (middle upper panel), chromatin organization (middle panel), cell cycle (middle lower panel) and vesicle trafficking (lower panel), which were differentially represented in strawberry fruits produced by plants subjected to the treatments with *Trichoderma* strains (T22, TH1 and GV41), as compared to control (Ctr). Shown are proteins presenting abundance fold changes  $\geq 1.50$  or  $\leq 0.66$  with respect to control ( $P \leq 0.05$ ) (Supplementary Table S3). Data are reported as  $\log_2$  transformed abundance ratio values.

**Supplementary Figure S9.** Heat-map representation of hierarchical clustering analysis of proteins with unknown function that were differentially represented in strawberry fruits produced by plants subjected to the treatments with *Trichoderma* strains (T22, TH1 and GV41), as compared to control (Ctr). Shown are proteins presenting abundance fold changes  $\geq 1.50$  or  $\leq 0.66$  with respect to control ( $P \leq 0.05$ ) (Supplementary Table S3). Data are reported as  $\log_2$  transformed abundance ratio values. Results related to proteins with unknown function are shown.

## References

- Holzwarth, M., Korhummel, S., Carle, R., and Kammerer, D. R. (2012). Evaluation of the Effects of Different Freezing and Thawing Methods on Color, Polyphenol and Ascorbic Acid Retention in Strawberries (*Fragaria* × *Ananassa* Duch.). *Food Res. Int.* 48, 241–248. doi: 10.1016/j.foodres.2012.04.004
- Carbone, F., Preuss, A., De Vos, R. C. H., D’Amico, E., Perrotta, G., Bovy, A. G., et al. (2009). Developmental, Genetic and Environmental Factors Affect the Expression of Flavonoid Genes, Enzymes and Metabolites in Strawberry Fruits. *Plant, Cell Environ.* doi: 10.1111/j.1365-3040.2009.01994
